# Supplementary material
Source: Research Square preprint supplement (doi:10.21203/rs.3.rs-8582392/v1)
Supplement: Supplementary file 1 [file 940f769b649bac5085a06705.docx]

**Supplementary Information Captions**

Fig. S1. Scanning Electron Microscopy (SEM) images of (A) Fe3O4, (B) MWCNTs-COOH, and (C) Fe3O4/MWCNTs-COOH.

Fig. S2. Magnetization curve of Fe3O4, MWCNTs-COOH, and Fe3O4/MWCNTs-COOH..

Table S1 Parameters of 12 pyrethroid pesticides determines by GC-MS/MS.

**
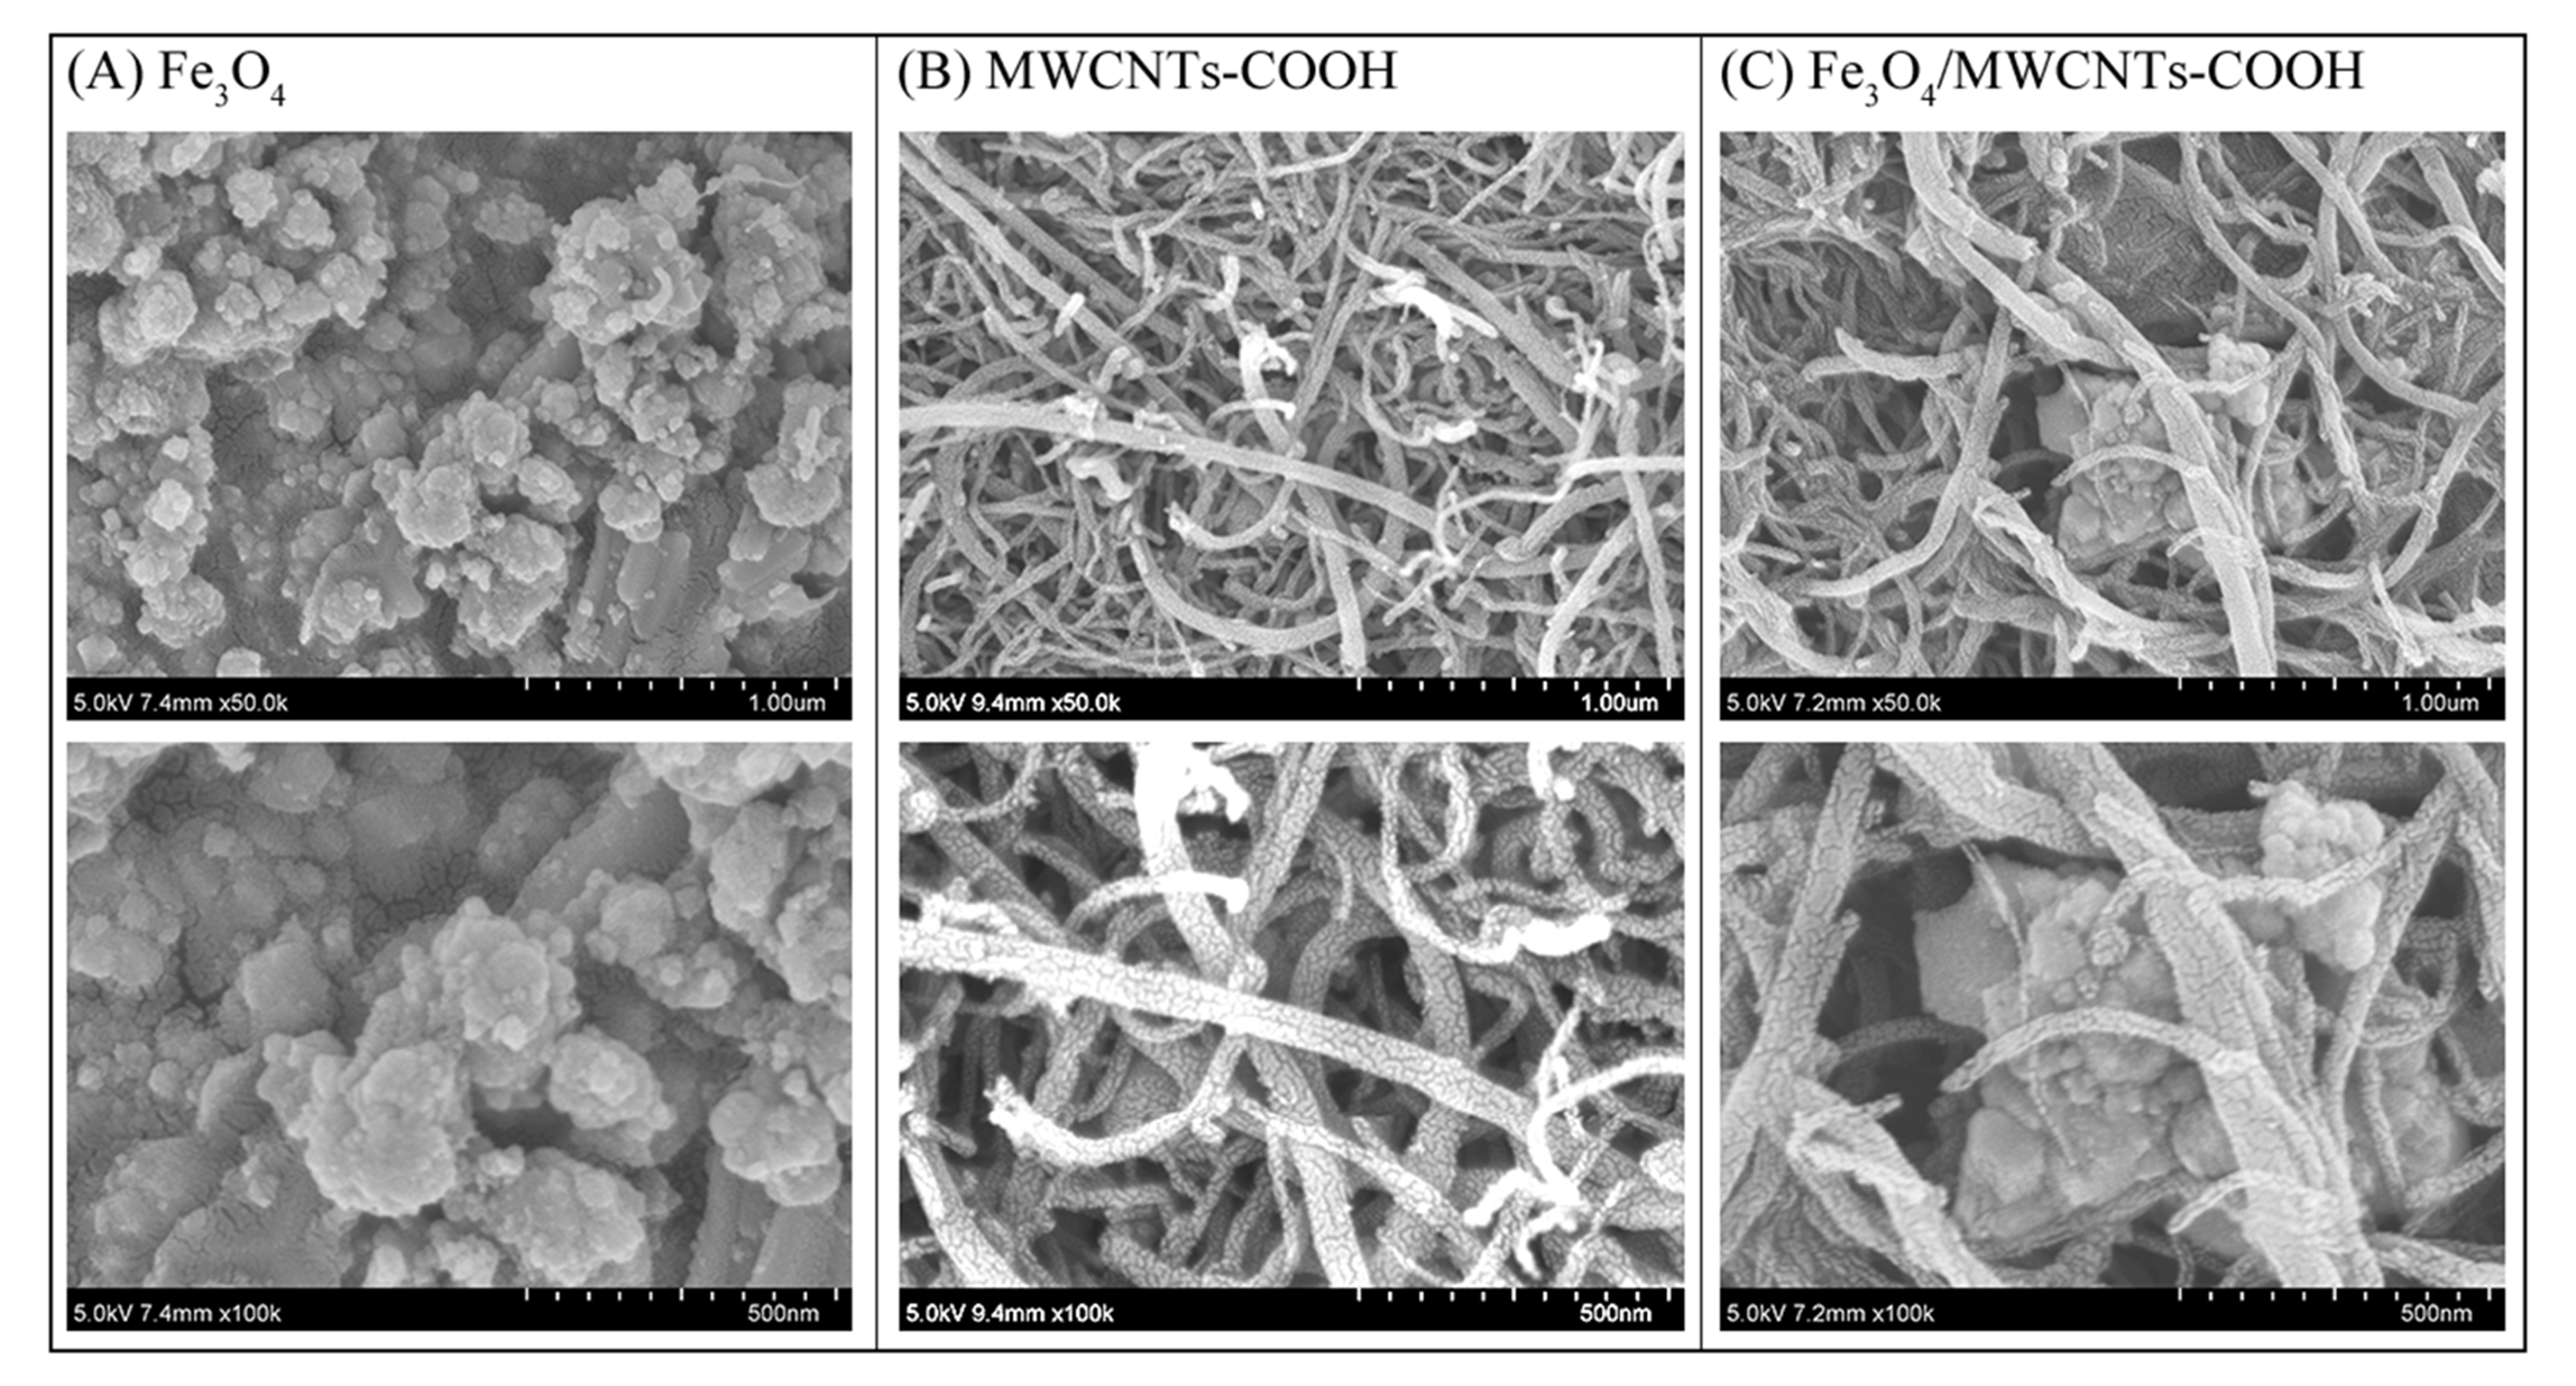
**

**Fig. S1.** Scanning Electron Microscopy (SEM) images of (A) Fe3O4, (B) MWCNTs-COOH, and (C) Fe3O4/MWCNTs-COOH.

**
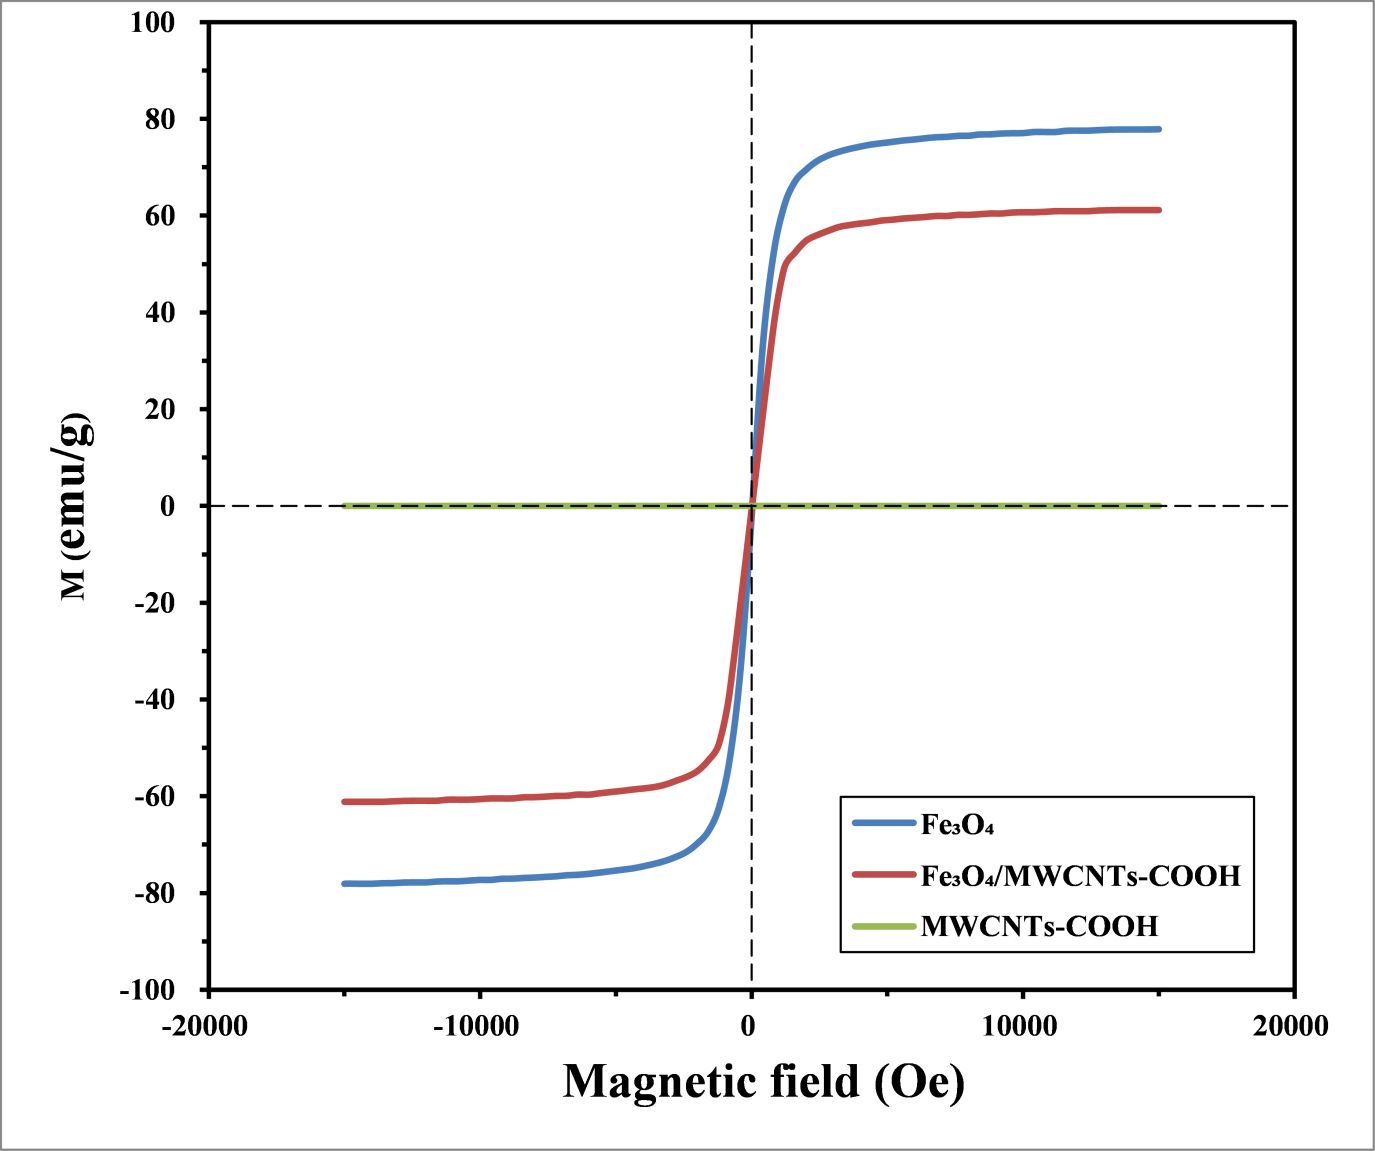
**

**Fig. S2.** Magnetization curve of Fe3O4, MWCNTs-COOH, and Fe3O4/MWCNTs-COOH.

**Table S1** Parameters of 12 pyrethroid pesticides determines by GC-MS/MS

| No. | Compounds | Retention times (min) | Quantitative ion transition (m/z) | Qualitative ion transition (m/z) | Collision energy (eV) | Dwell time (ms) |
| --- | --- | --- | --- | --- | --- | --- |
| 1 | Tetramethrin | 13.857 | 164.0→77.1 | 164.0→107.1 | 25/10 | 18.3 |
| 2 | Bifenthrin | 13.859 | 181.2→165.2 | 181.2→166.2 | 25/10 | 14.4 |
| 3 | Fenpropathrin | 13.985 | 181.1→152.1 | 125.0→55.1 | 25/10 | 25.1 |
| 4 | Lamda-cyhalothrin | 14.830 | 208.0→181.0 | 181.1→152.0 | 5/25 | 40.8 |
| 5 | Acrinathrin | 14.829 | 181.0→152.0 | 181.0→127.0 | 30/30 | 24.1 |
| 6 | Biopermethrin | 15.555 | 183.1→168.1 | 183.1→165.1 | 10/10 | 36.7 |
| 7 | Cyfluthrin | 16.214 | 162.9→90.9 | 162.9→127.0 | 15/5 | 25.0 |
| 8 | Cypermethrin | 16.529 | 163.0→91.0 | 163.0→127.0 | 10/5 | 17.2 |
| 9 | Flucythrinate | 16.651 | 156.9→107.1 | 156.9→77.0 | 15/35 | 28.4 |
| 10 | Fenvalerate | 17.616 | 167.0→125.1 | 181.0→152.1 | 5/20 | 25.2 |
| 11 | Fluvalinate | 17.651 | 250.0→55.0 | 250.0→200.0 | 20/20 | 16.9 |
| 12 | Deltamethrin | 18.253 | 252.9→93.0 | 252.9→174.0 | 15/5 | 25.2 |
